# Supplementary material for: Compound events in Germany in 2018: drivers and case studies
Source: Copernicus journal article supplement (doi:10.5194/nhess-25-541-2025), 2025-02-07
Supplement: Supplementary file 1 [file nhess-25-541-2025-supplement.pdf]

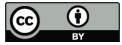

*Supplement of*

## **Compound events in Germany in 2018: drivers and case studies**

**Elena Xoplaki et al.**

*Correspondence to:* Elena Xoplaki (elena.xoplaki@geogr.uni-giessen.de)

The copyright of individual parts of the supplement might differ from the article licence.

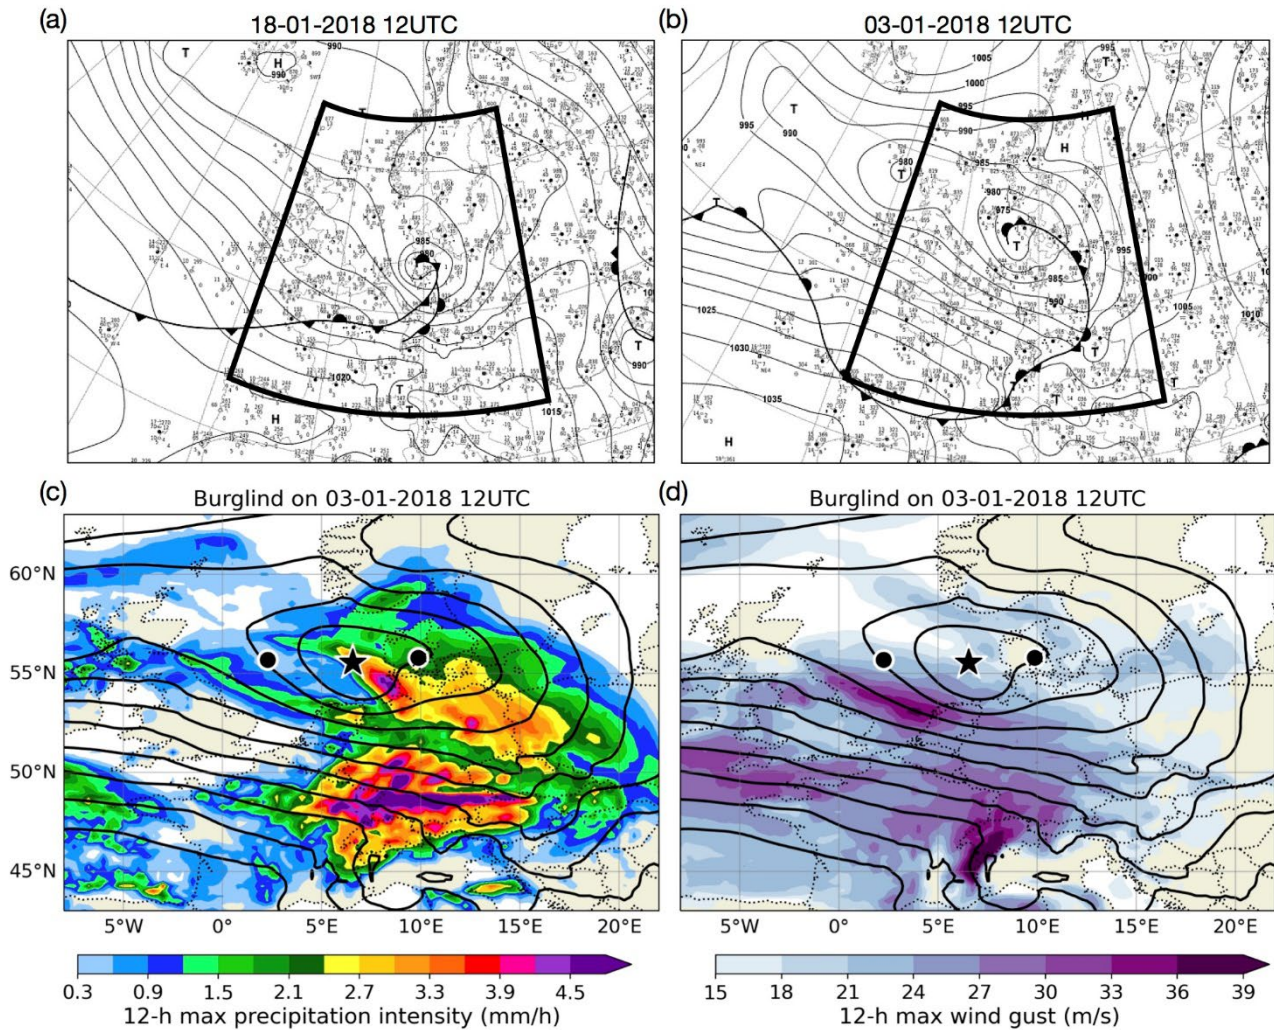

5 **Figure S1:** (a) Surface weather analysis produced by The Deutscher Wetterdienst (DWD) at 1200 UTC on 18 January 2018, when windstorm Friederike passed through Germany. (b) As (a) but on 3 January 2018 for windstorm Burglind. Charts were downloaded from Wetter3.de (n.d.). (c) Mean sea level pressure (thick contours; increasing from 960 hPa with 5 hPa intervals) at 1200 UTC on 3 January 2018 (location of Burglind shown by the star) and maximum precipitation intensity (shaded) during 6 hours before and after (black circles) based on the ERA5 reanalysis. The corresponding region of this zoom-in view in the weather chart is indicated by the thick black lines in (a) & (b). (d) As b, but for the wind gust at 10 m height (shaded).
